# Supplementary material for: Baking black opal in the desert sun: The importance of silica in desert varnish: COMMENT AND REPLY: COMMENT
Source: Oxford University Press journal article supplement (doi:10.1130/g23410c.1), 2007-01-01
Supplement: i0091-7613-35-1-e122.pdf [file i0091-7613-35-1-e122.pdf]

## Baking black opal in the desert sun: The importance of silica in desert varnish:

### COMMENT AND REPLY

**COMMENT:** doi: 10.1130/G23410C.1

**Ronald I. Dorn**

*School of Geographical Sciences, Arizona State University, Tempe, Arizona 85287-0104, USA*

Perry et al. (2006) contribute a fourth alternative, of silica binding, to three prior hypotheses of varnish formation: 1) abiotic Mn-Fe enhancement (e.g., Engel and Sharp, 1958); 2) biotic Mn-Fe enhancement (e.g., Dorn and Oberlander, 1982; Allen et al., 2004); and 3) a polygenetic clay-bacteria hypothesis (Dorn, 1998; Krinsley, 1998). Commentary by Berardelli (2006) also reveals that Perry et al. offer silica binding as a comprehensive model of how varnish forms.

A silica-binding model of varnish formation, however, is contradicted by prior literature in six independent ways. (1) A successful model of varnish formation must explain the tremendous enhancement of Mn in varnish (Engel and Sharp, 1958; Dorn and Oberlander, 1982; Potter and Rossman, 1979) but silica binding does not. Similarly, Mn-mineralogy of varnish (Potter, 1979; Potter and Rossman, 1979; McKeown and Post, 2001; Probst et al., 2002) is not explained by silica binding. (2) A successful model must explain the clear dominance of clay minerals in varnish (e.g., Potter and Rossman, 1977; Potter, 1979; Krinsley et al., 1995; Israel et al., 1997; Dorn, 1998 [Ch.10]; Krinsley, 1998; Probst et al., 2002; Allen et al., 2004) as opposed to the paucity of clay minerals in silica glaze (Curtiss et al., 1985; Dorn, 1998 [Ch. 13]), yet silica binding cannot. (3) A successful model must explain rock-coating geography. For example, one of Earth's best Mars analogs exists on the Tibetan Plateau, where a study of varnish from the Ashikule Basin of the West Kunlun Mountains finds varnish resting adjacent to silica glaze at scales of microns to meters (Dorn, 1998, [Ch.15]). Silica binding fails to explain this common geographical juxtaposition. (4) The "baking" requirement runs contrary to varnish in subsurface and cold-climate settings (Douglas, 1987; Whalley et al., 1990; Dorn et al., 1992; Douglas et al., 1994). (5) Varnish microlamination analyses of over 10,000 sedimentary microbasins (Liu and Broecker, 2000; Liu et al., 2000; Broecker and Liu, 2001; Liu, 2003; Liu, 2006; Liu and Broecker, 2006), a method subjected to blind testing (Marston, 2003), represents the single largest varnish data set (Dorn, 2006). Yet, silica binding does not explain systematic differential Mn-Fe patterns that dominate varnish. (6) A successful model must explain rates of accretion ~1–10  $\mu\text{m}$  per millennia (Dorn, 1998; Liu and Broecker, 2000), confirmed by further studies (Liu, 2003; Liu, 2006; Liu and Broecker, 2006). Whatever process creates varnish must have the extreme rate-limiting step that silica binding lacks. Silica glaze, in contrast, accretes in microns per decade (Curtiss et al., 1985; Gordon and Dorn, 2005).

The conclusion held by Perry et al. (2006) that silica glazes and varnishes are genetically linked appears to be contradicted by six independent criteria used in prior literature. Thus, silica binding is not important in forming the vast majority of varnishes. However, it is possible that silica binding could play a role in the genesis of a very specific type of varnish: ground-line bands found in warm deserts (cf. Engel and Sharp, 1958; Dorn, 1998 [Ch. 10]). This is the type of varnish that appears to be featured in post-publication photographs and press releases (cf. Berardelli, 2006) about Perry et al. (2006).

#### REFERENCES CITED

- Allen, C., Probst, L.W., Flood, B.E., Longazo, T.G., Scheble, R.T., and Westall, F., 2004, Meridiani Planum hematite deposit and the search for evidence of life on Mars—Iron mineralization of microorganisms in rock varnish: *Icarus*, v. 171, p. 20–30, doi: 10.1016/j.icarus.2004.04.015.
- Berardelli, P., 2006, Solving the mystery of desert varnish: *ScienceNOW*, v. 707, p. 1.
- Broecker, W.S., and Liu, T., 2001, Rock varnish: Recorder of desert wetness?: *GSA Today*, v. 11, no. 8, p. 4–10, doi: 10.1130/1052-5173(2001)011<0004:RVRODW>2.0.CO;2.
- Curtiss, B., Adams, J.B., and Giorso, M.S., 1985, Origin, development and chemistry of silica-alumina rock coatings from the semiarid regions of the island of Hawaii: *Geochimica et Cosmochimica Acta*, v. 49, p. 49–56, doi: 10.1016/0016-7037(85)90190-5.
- Dorn, R.I., 1998, Rock coatings: Amsterdam, Elsevier, 429 p.
- Dorn, R.I., 2007, Rock varnish, in Nash, D.J., and McLaren, S.J., eds., *Geochemical Sediments and Landscapes*: London, Blackwell, (in press).
- Dorn, R.I., and Oberlander, T.M., 1982, Rock varnish: *Progress in Physical Geography*, v. 6, p. 317–367.
- Dorn, R.I., Krinsley, D.H., Liu, T., Anderson, S., Clark, J., Cahill, T.A., and Gill, T.E., 1992, Manganese-rich rock varnish does occur in Antarctica: *Chemical Geology*, v. 99, p. 289–298, doi: 10.1016/0009-2541(92)90182-5.
- Douglas, G.R., 1987, Manganese-rich rock coatings from Iceland: *Earth Surface Processes and Landforms*, v. 12, p. 301–310.
- Douglas, G.R., McGreevy, J.P., and Whalley, W.B., 1994, Mineralogical aspects of crack development and freeface activity in some basalt cliffs, County Antrim, Northern Ireland, in Robinson, D.A., and Williams, R.B.G., eds., *Rock weathering and landform evolution*: Chichester, UK, Wiley, p. 71–88.
- Engel, C.G., and Sharp, R.S., 1958, Chemical data on desert varnish: *Geological Society of America Bulletin*, v. 69, p. 487–518.
- Gordon, S.J., and Dorn, R.I., 2005, Localized weathering: Implications for theoretical and applied studies: *The Professional Geographer*, v. 57, p. 28–43.
- Israel, E.J., Arvidson, R.E., Wang, A., Pasteris, J.D., and Jolliff, B.L., 1997, Laser Raman spectroscopy of varnished basalt and implications for in situ measurements of Martian rocks: *Journal of Geophysical Research-Planets*, v. 102, E12, p. 28705–28716, doi: 10.1029/97JE02399.
- Krinsley, D., 1998, Models of rock varnish formation constrained by high resolution transmission electron microscopy: *Sedimentology*, v. 45, p. 711–725, doi: 10.1046/j.1365-3091.1998.00172.x.
- Krinsley, D.H., Dorn, R.I., and Tovey, N.K., 1995, Nanometer-scale layering in rock varnish: Implications for genesis and paleoenvironmental interpretation: *The Journal of Geology*, v. 103, p. 106–113.
- Liu, T., 2003, Blind testing of rock varnish microstratigraphy as a chronometric indicator: Results on late Quaternary lava flows in the Mojave Desert, California: *Geomorphology*, v. 53, p. 209–234, doi: 10.1016/S0169-555X(02)00331-8.
- Liu, T., 2006, VML Dating Lab: <http://www.vmldatinglab.com/> (accessed 24 June 2006).
- Liu, T., and Broecker, W.S., 2000, How fast does rock varnish grow?: *Geology*, v. 28, p. 183–186, doi: 10.1130/0091-7613(2000)028<0183:HFDRVG>2.3.CO;2.
- Liu, T., and Broecker, W., 2006, Holocene rock varnish microstratigraphy and its chronometric application in drylands of western USA: *Geomorphology*, v. 84, p. 1–21, doi: 10.1016/j.geomorph.2006.06.008.
- Liu, T., Broecker, W.S., Bell, J.W., and Mandeville, C., 2000, Terminal Pleistocene wet event recorded in rock varnish from the Las Vegas Valley, southern Nevada: *Palaeogeography, Palaeoclimatology, Palaeoecology*, v. 161, p. 423–433, doi: 10.1016/S0031-0182(00)00097-3.
- Marston, R.A., 2003, Editorial note: *Geomorphology*, v. 53, p. 197, doi: 10.1016/S0169-555X(02)00329-X.
- McKeown, D.A., and Post, J.E., 2001, Characterization of manganese oxide mineralogy in rock varnish and dendrites using X-ray absorption spectroscopy: *The American Mineralogist*, v. 86, p. 701–713.
- Perry, R.S., Lynne, B.Y., Sephton, M.A., Kolb, V.M., Perry, C.C., and Staley, J.T., 2006, Baking black opal in the desert sun: The importance of silica in desert varnish: *Geology*, v. 34, p. 537–540, doi: 10.1130/G22352.1.
- Potter, R.M., 1979, The tetravalent manganese oxides: Clarification of their structural variations and relationships and characterization of their occurrence in the terrestrial weathering environment as desert varnish and other manganese oxides, Ph.D. thesis: Pasadena, California, California Institute of Technology, 245 p.
- Potter, R.M., and Rossman, G.R., 1977, Desert varnish: The importance of clay minerals: *Science*, v. 196, p. 1446–1448.
- Potter, R.M., and Rossman, G.R., 1979, The manganese- and iron-oxide mineralogy of desert varnish: *Chemical Geology*, v. 25, p. 79–94, doi: 10.1016/0009-2541(79)90085-8.

Probst, L.W., Allen, C.C., Thomas-Keptra, K.L., Clemett, S.J., Longazo, T.G., Nelman-Gonzalez, M.A., and Sams, C., 2002, Desert varnish—Preservation of biofabrics and implications for Mars: 33<sup>rd</sup> Lunar and Planetary Science Conference, March 11-15, 2002, Houston, Texas, Abstract 1764.

Whalley, W.B., Gellatly, A.F., Gordon, J.E., and Hansom, J.D., 1990, Ferromanganese rock varnish in north Norway: A subglacial origin: *Earth Surface Processes and Landforms*, v. 15, p. 265–275.

**REPLY:** doi: 10.1130/G23663Y.1

**Randall S. Perry**  
**Mark A. Sephton**

*Impacts and Astromaterials Research Centre, Department of Earth Science and Engineering, South Kensington Campus, Imperial College, London SW7 2AZ, UK*

We welcome the opportunity to reply to Dorn (2007) who outlines the classical issues of desert varnish formation. We agree that most previous research has suggested a biological mechanism. Bacterial enhancement of manganese, in manganese-rich coatings is intriguing. However, as we have published (Perry et al., 2006), there is no evidence of a *direct* link with microbes and varnish formation. In our studies, we rarely see microbes in or on the surface, even after critically point-dried specimens are viewed. Similar observations have been made by others who also noted the lack of bacteria in desert varnish (Taylor-George et al., 1983).

In our recent research, we have also observed silica coatings that are enhanced in manganese in Antarctica. Few microbes are known to exist in these locations, which removes the possibility of biologically mediated processes. We note that manganese-rich varnishes from Antarctica have been investigated previously (Dorn et al., 1992) and it was suggested that budding bacteria might be the cause, but the authors could not rule out contamination added in transit or in the lab.

It has been established experimentally that microbes are not needed to enhance manganese (Krauskopf, 1957; Jones, 1991), and varnish-like coatings have been produced in the laboratory without microbial involvement (Kolb et al., 2004; Perry et al., 2005). However, microbes do co-exist with minerals on rock surfaces, and a microbial involvement in other locations should not be ruled out. Specifically, bacterial DNA has been extracted from varnishes (Perry et al., 2004; Kuhlman et al., 2005, 2006) and other biological compounds (Perry et al., 2003; Schelble et al., 2005) but a biological causal mechanism has not been established. As we suggest in *Geology*, biological materials are probably entombed within silica in rock coatings and hot-spring silica (Lynne et al., 2006; Perry et al., 2006).

Other authors have suggested that silica might be involved in desert varnish formation and have noted the existence of silica glazes interlayered with manganese-enhanced silica-rich coatings (Farr, 1981; Smith and Whalley, 1988). Varnishes form by relatively slow accretion, and the source materials are dusts or dissolved constituents in the atmosphere introduced by direct deposition (Thiagarajan and Lee, 2004). It follows that varnish deposition will reflect components available in the environment. If the entities available vary, then silica glaze deficient in manganese, iron, or other trace metals might be deposited under one environmental condition and trace element enhanced deposits in another. Such a process causes a colorless glaze to be interlayered with desert varnish. The environmental control on coating formation is illustrated by the fact that desert varnish and glazes that are juxtaposed are not the same thickness, suggesting that different environmental controls, primarily related to moisture, might control differences in deposition rate.

Conventional interpretations also suggest that manganese and clays are the predominant mineral components in desert varnish. Our work, however, reveals that silicon is usually the predominant element in var-

nishes, and aluminum is sometimes the second most abundant. Aluminum quantities are highly variable and often not consistent with Al/Si ratios in clays. Clays are present in varnishes (Potter and Rossman, 1977), but we have only found minimal clay content in varnishes using particle size separations. The role of silica in desert varnish formation has been substantially neglected in previous research. We look forward to the contributions of others in furthering our understanding this enigmatic coating and elucidating its silica-based formation mechanism.

## REFERENCES CITED

- Dorn, R.I., Krinsley, D.H., Liu, T., Anderson, S., Clark, J., Cahill, T.A., and Gill, T.E., 1992, Manganese-rich rock varnish does occur in Antarctica: *Chemical Geology*, v. 99, p. 289–298, doi: 10.1016/0009-2541(92)90182-5.
- Farr, T.G., 1981, Surface weathering of rocks in semiarid regions and its importance for geologic remote sensing, unpublished Ph.D. thesis, Seattle, Washington, University of Washington, 161 p.
- Jones, C.E., 1991, Characteristics and origin of rock varnish from the hyperarid coastal deserts of Northern Peru: *Quaternary Research*, v. 35, p. 116–129, doi: 10.1016/0033-5894(91)90099-Q.
- Kolb, V.M., Philips, A.I., and Perry, R.S., 2004, Testing the role of silicic acid and biochemical materials in the formation of rock coatings, *in* Hoover, R.B., Levin, G.V., and Rozanov, A.Y., eds., *Instruments, Methods, and Missions for Astrobiology VIII*: Bellingham, Washington, International Society for Optical Engineering, p. 116–125.
- Krauskopf, K.B., 1957, Separation of manganese from iron in sedimentary processes: *Geochimica et Cosmochimica Acta*, v. 12, p. 61–84, doi: 10.1016/0016-7037(57)90018-2.
- Kuhlman, K.R., Allenbach, L.B., Ball, C.L., Fusco, W.G., La Duc, M.T., Kuhlman, G.M., Anderson, R.C., Erickson, I.K., Stuecker, T., Benardini, J., and Crawford, R.L., 2005, Ultraviolet (UV-C) resistant bacteria isolated from rock varnish in the Whipple Mountains, California: *Icarus*, v. 174, p. 585–595, doi: 10.1016/j.icarus.2004.11.022.
- Kuhlman, K.R., Fusco, W.G., La Duc, M.T., Allenbach, L.B., Ball, C.L., Kuhlman, G.M., Anderson, R.C., Erickson, I.K., Stuecker, T., Benardini, J., Strap, J.L., and Crawford, R.L., 2006, Diversity of microorganisms within rock varnish in the Whipple Mountains, California: *Applied and Environmental Microbiology*, v. 72, p. 1708–1715, doi: 10.1128/AEM.72.2.1708-1715.2006.
- Lynne, B.Y., Campbell, K.A., Perry, R.S., Browne, P.R.L., and Moore, J.N., 2006, Acceleration of sinter diagenesis in an active fumarole, Taupo Volcanic Zone, New Zealand: *Geology*, v. 34, p. 749–752, doi: 10.1130/G22523.1.
- Perry, R.S., Engel, M.H., Botta, O., and Staley, J.T., 2003, Amino acid analyses of desert varnish from the Sonoran and Mojave Deserts: *Geomicrobiology Journal*, v. 20, p. 427–438.
- Perry, R.S., Dodsworth, J., Staley, J.T., and Engel, M.H., 2004, Bacterial diversity in desert varnish, Third European Workshop on Exo/Astrobiology, Mars: The Search for life: Netherlands, ESA Publications, SP-545, p. 259–260.
- Perry, R.S., Kolb, V.M., Ajish, P.I., Lynne, B.Y., McLoughlin, N., Sephton, M.A., Wacey, D., and Green, O.R., 2005, Making silica rock coatings in the lab: Synthetic desert varnish *in* Hoover, R.B., Levin, G.V., Rosanov, A.Y., and Gladstone, R.G., eds., *Astrobiology*: Bellingham, Washington, International Society for Optical Engineering, p. 265–275.
- Perry, R.S., Lynne, B.Y., Sephton, M., Kolb, V.M., Perry, C.C., and Staley, J.T., 2006, Baking black opal in the desert sun: The importance of silica in desert varnish: *Geology*, v. 34, p. 537–540, doi: 10.1130/G22352.1.
- Potter, R.M., and Rossman, G.R., 1977, Desert varnish: The importance of clay minerals: *Science*, v. 196, p. 1446–1448, doi: 10.1126/science.196.4297.1446.
- Schelble, R.T., McDonald, G.D., Hall, J.A., and Neelson, K.H., 2005, Community structure comparison using FAME analysis of desert varnish and soil, Mojave Desert, California: *Geomicrobiology Journal*, v. 22, p. 353–360, doi: 10.1080/01490450500248754.
- Smith, B.J., and Whalley, W.B., 1988, A note on the characteristics and possible origins of desert varnishes for southeast Morocco: *Earth Science Processes and Landforms*, v. 13, p. 251–258.
- Taylor-George, S., Palmer, F.E., Staley, J.T., Borns, D.J., Curtiss, D.J., and Adams, J.B., 1983, Fungi and bacteria involved in desert varnish formation: *Microbial Ecology*, v. 9, p. 227–245, doi: 10.1007/BF02097739.
- Thiagarajan, N., and Lee, C.-T.A., 2004, Trace-element evidence for the origin of desert varnish by direct aqueous atmospheric deposition: *Earth and Planetary Science Letters*, v. 224, p. 131–141, doi: 10.1016/j.epsl.2004.04.038.
